# Supplementary material
Source: MDPI journal article supplement (https://www.mdpi.com/2073-4395/9/10/648)
Supplement: s1 [file s1]

Archive with 2 entries (2 files):
- agronomy-606631-supplementary-final proofreading.docx
- agronomy-606631-supplementary-final proofreading.pdf
